# Supplementary material
Source: PubMed Central journal article supplement (PMC3367670)
Supplement: cbt1209_0818SD1.pdf [file cbt1209_0818SD1.pdf]

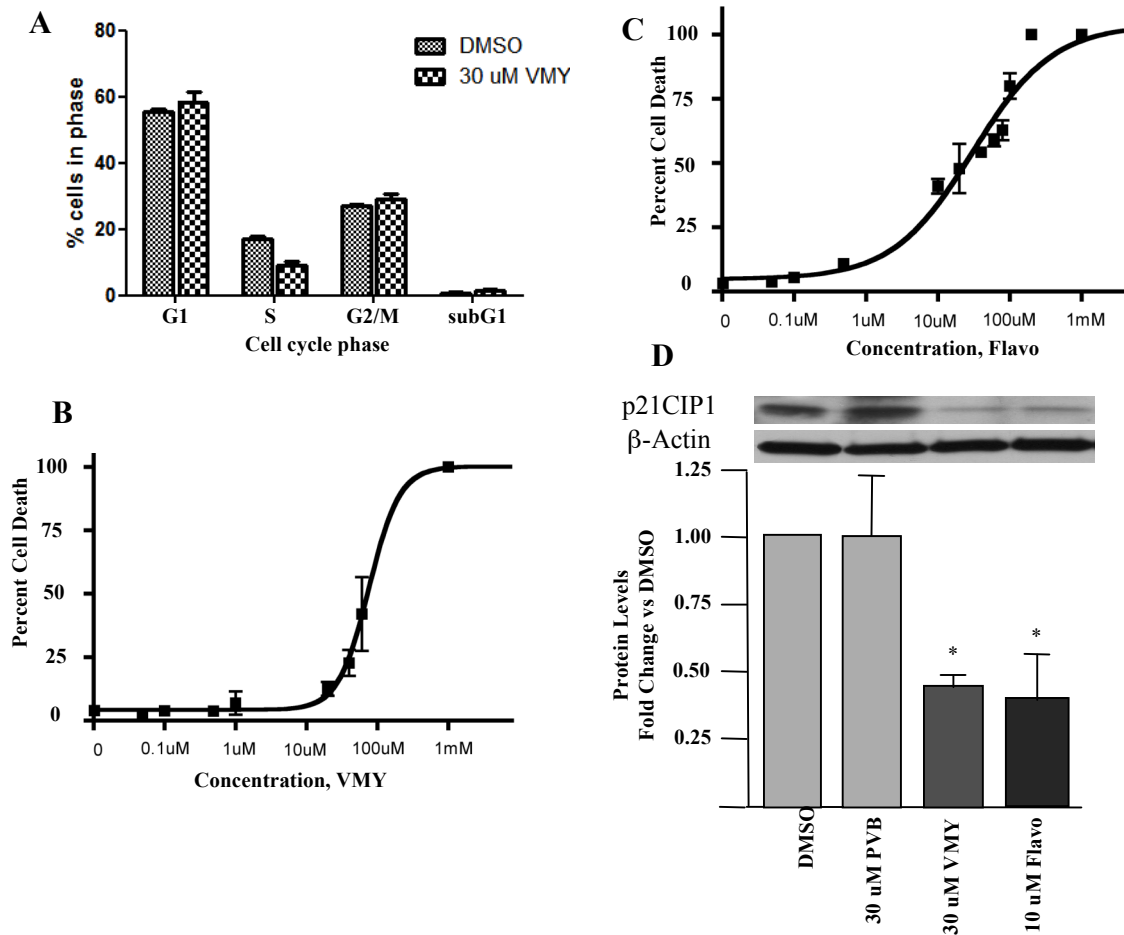

**Supplemental Fig 1.** Effects of VMY. **A)** Cell cycle profile of NIH3T3 cells treated with VMY as shown. **B,C)** determination of ED50 levels for cell death with VMY or Flavo (flavopiridol,) respectively. PVB failed to induce more than 8% cell death at concentrations as high as 60 uM, **D)** Effect of PVB, VMY or Flavo (flavopiridol) on p21CIP1 levels. Western blotting was performed on extracts from DAOY cells Average and standard deviation for  $N \geq 3$  separate experiments. **Inset.** A representative western blot showing protein levels of p21CIP1 and  $\beta$ -actin. \*,  $p \leq 0.05$ . In all experiment, cells were treated were for 18 hours.

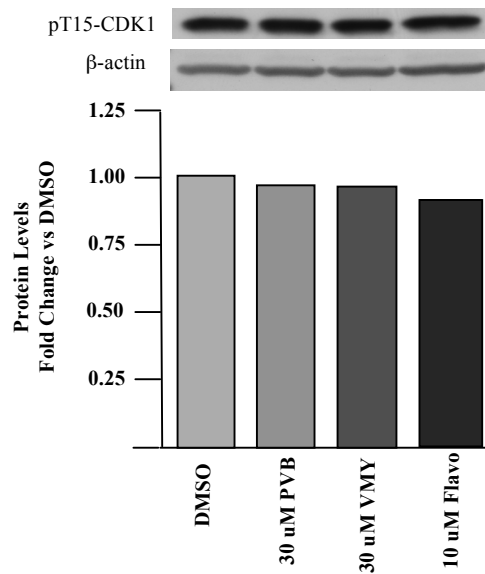

**Supplemental Fig 2.** Effect of VMY and flavopiridol on CDK1. DAOY cells were treated with nocodazole for 18 hours. The nocodazole was removed and the cells were treated for 1 hour with the compounds as shown. The levels of tyrosine-15 phosphorylation CDK1 were assessed using an anti phospho-tyrosine-15 CDK1 antibody (Cell Signaling). PVB, VMY and Flavopiridol (Flavo) had no significant effect on levels the inhibitory T-15 phosphorylation site on CDK1. **Inset.** Western blot showing protein levels of pT15-CDK1 and β-actin.

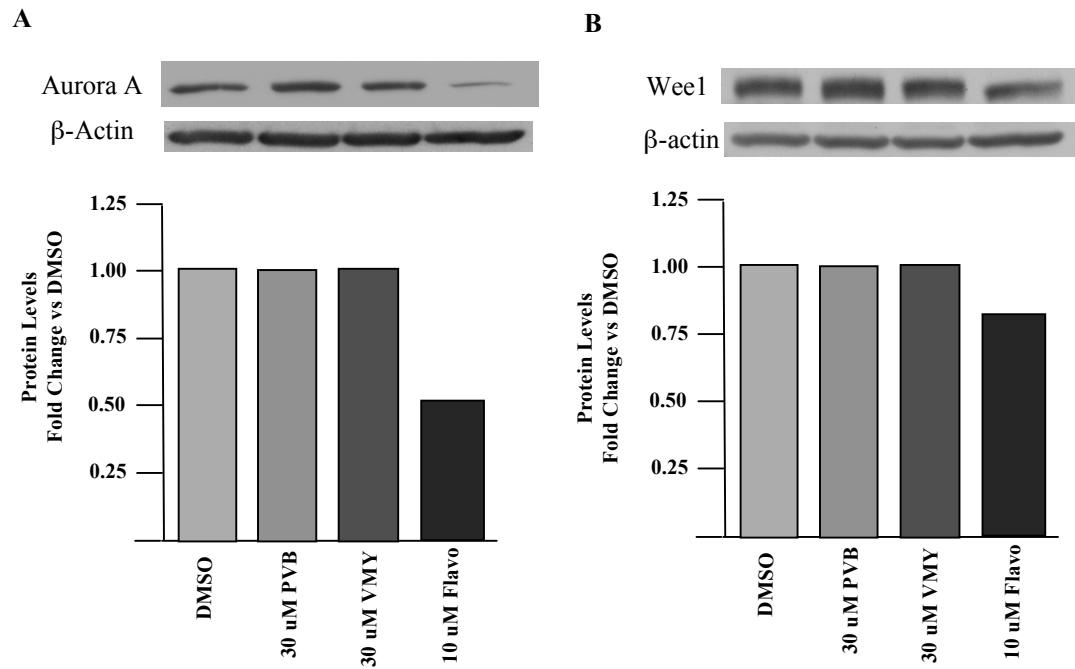

**Supplemental Fig 3.** Effect of PVB, VMY and flavopiridol on **A)** Aurora Kinase A (Sigma) and **B)** Wee1(Santa Cruz) protein levels. Western blotting was performed on extracts from DAOY cells treated as shown for 1 hour following release from 18 hrs nocodazole block. **Insets.** Western blot showing protein levels of **A)** Aurora Kinase A, **B)** Wee1 and β-actin. Flavo, flavopiridol.
